# Supplementary figures and images for: A global study for acute myeloid leukemia with RARG rearrangement
Source: PubMed Central journal article supplement — Blood Adv. 2023 Feb 21;7(13):2972–82. doi: 10.1182/bloodadvances.2022008364 (PMC10320208; doi:10.1182/bloodadvances.2022008364), 2023-02-21

# Supplemental Figure 1

**A**

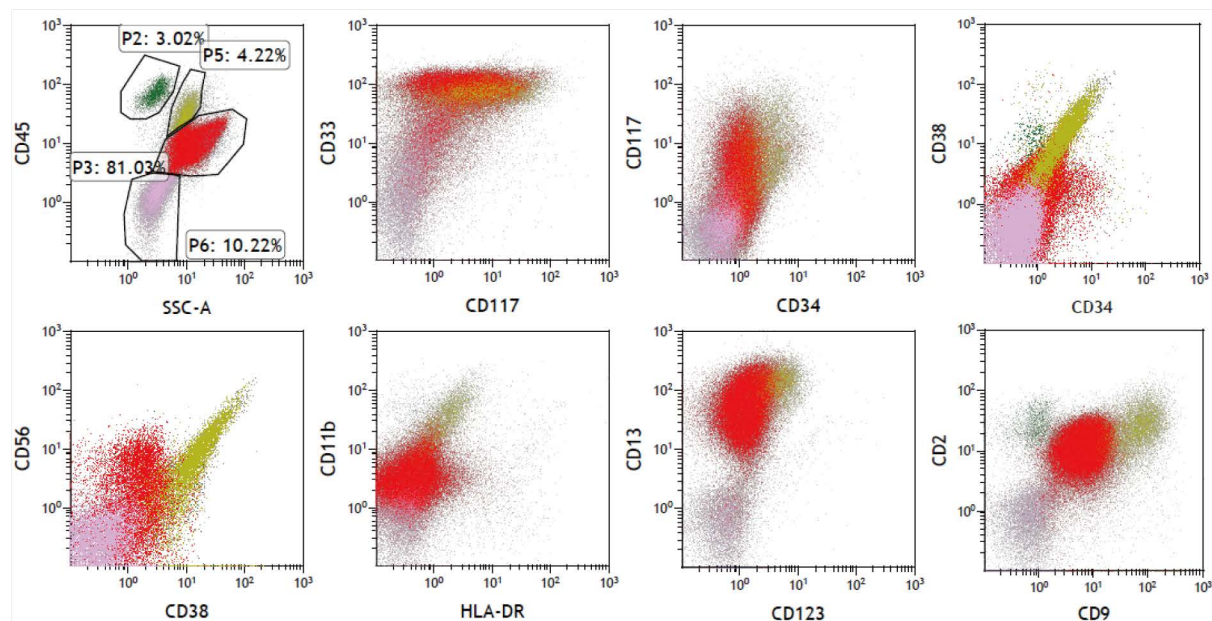

**B**

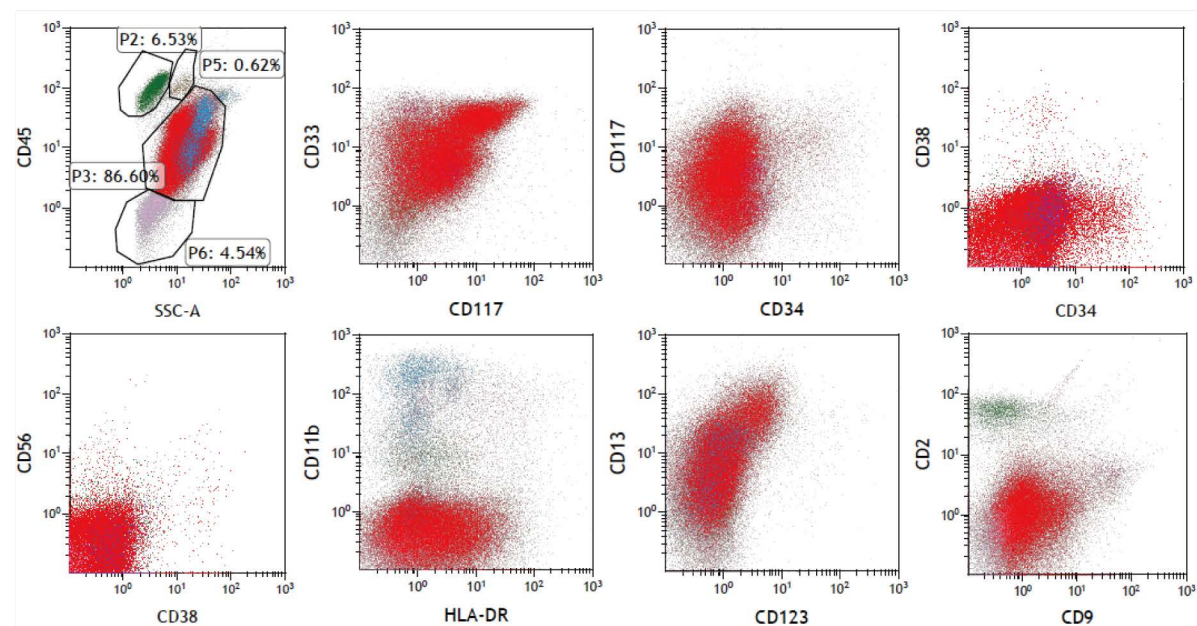

**C**

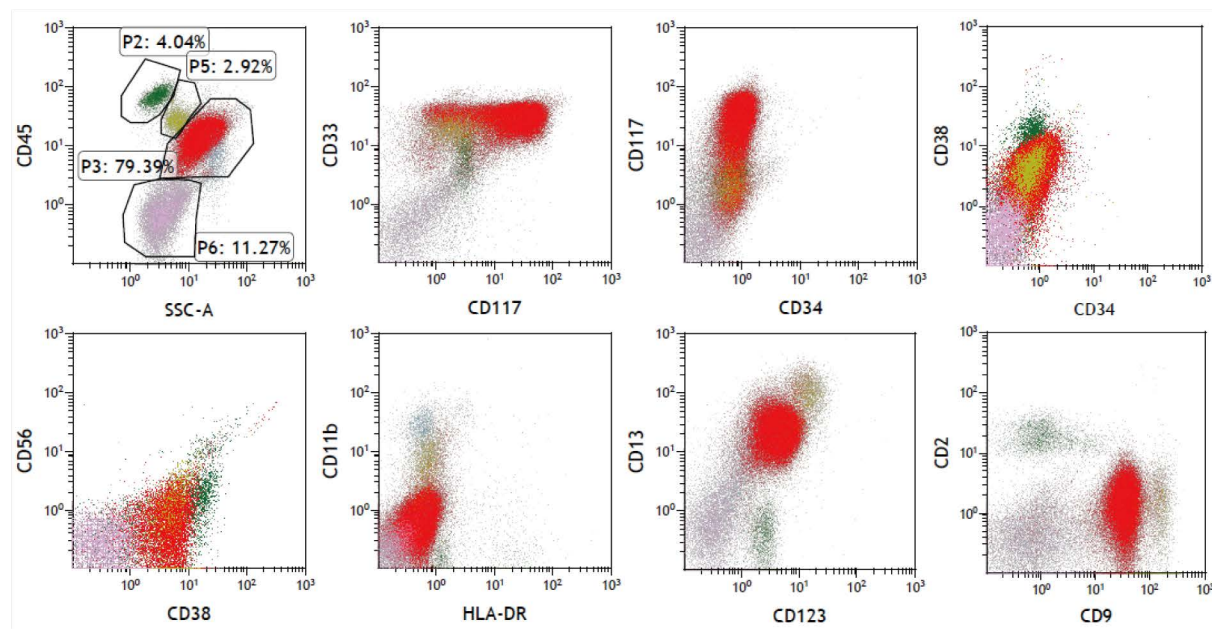

# Supplemental Figure 2

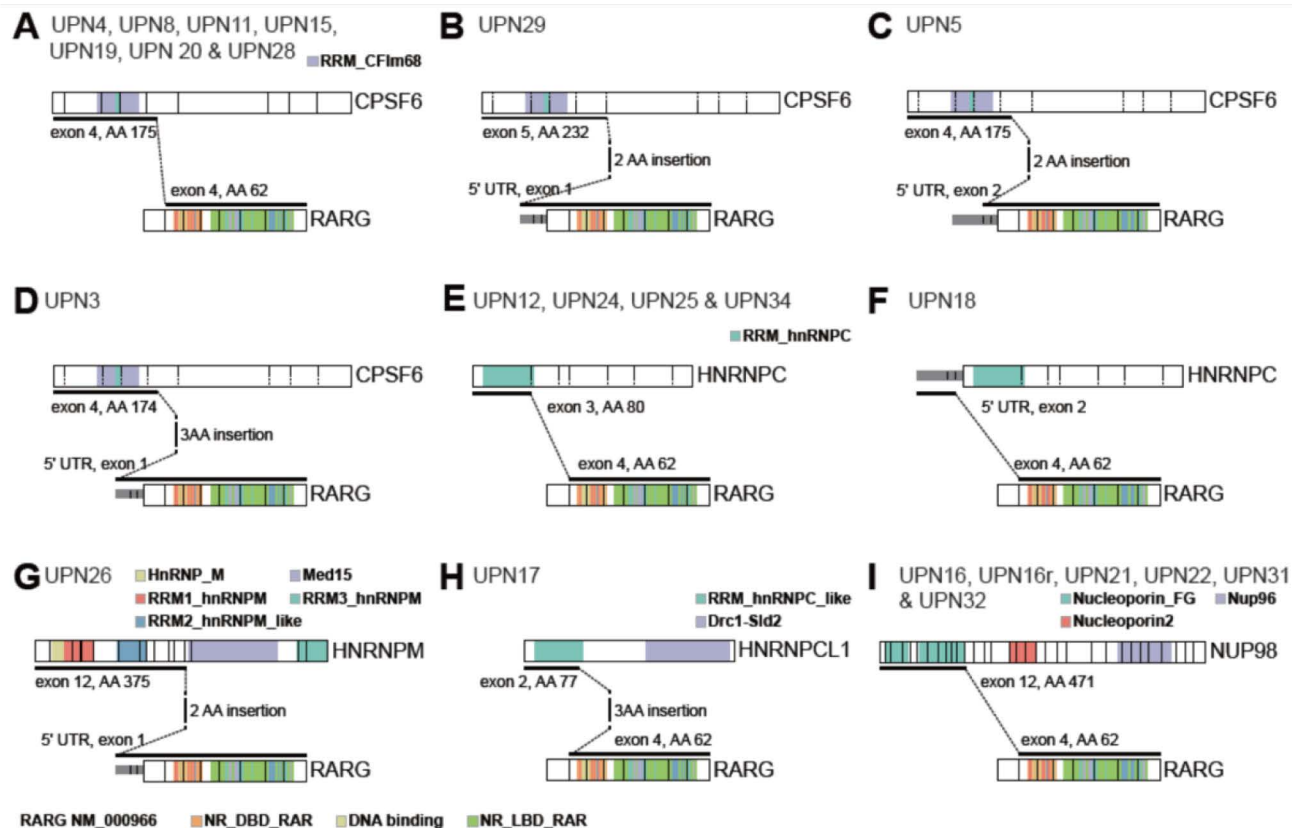

Supplement: BLOODA_ADV-2022-008364-mmc1.pdf [file BLOODA_ADV-2022-008364-mmc1.pdf]
